# Supplementary material for: Percutaneous nephrostomy versus retrograde ureteral stenting for acute upper obstructive uropathy: a systematic review and meta-analysis
Source: PubMed Central journal article supplement (PMC7988020; doi:10.1038/s41598-021-86136-y), 2021-03-23
Supplement: 41598_2021_86136_MOESM1_ESM.pdf [file 41598_2021_86136_MOESM1_ESM.pdf]

## Appendix 1

### MEDLINE

((nephrostomy[Title/Abstract] AND ("obstructive uropathy"[Title/Abstract] OR obstructi\*[Title/Abstract] OR uropathy[Title/Abstract] OR hydronephrosis[Title/Abstract] OR sepsis[Title/Abstract] OR stone[Title/Abstract] OR calcul\*[Title/Abstract] OR tumour[Title/Abstract] OR tumor[Title/Abstract] OR malignan\*[Title/Abstract])) AND stent\*[Title/Abstract] AND ("quality of life"[Title/Abstract] OR complication\*[Title/Abstract] OR pain[Title/Abstract] OR "urinary symptom\*" [Title/Abstract]))

### CINAHL

AB nephrostomy AND AB ("obstructive uropathy" OR obstructi\* OR hydronephrosis OR sepsis OR stone OR calcul\* OR tum?r OR malignan\*)

### CENTRAL

(nephrostomy):ti,ab,kw AND ("obstructive uropathy" OR obstructi\* OR uropathy OR hydronephrosis OR sepsis OR stone OR calcul\* OR tum?r OR malignan\*):ti,ab,kw AND (stent\*):ti,ab,kw AND ("quality of life" OR complication\* OR pain OR "urinary symptom\*"):ti,ab,kw (Word variations have been searched)

EMBASE

'obstructive uropathy'/exp AND 'percutaneous nephrostomy'/exp AND 'Article'/it AND [adult]/lim AND 'Article'/it AND [adult]/lim AND ('clinical article'/de OR 'clinical trial'/de OR 'comparative study'/de OR 'controlled clinical trial'/de OR 'controlled study'/de OR 'human'/de OR 'major clinical study'/de OR 'prospective study'/de OR 'randomized controlled trial'/de OR 'retrospective study'/de)
